# Supplementary material
Source: publisher figshare collection journal article supplement (https://sage.figshare.com/ndownloader/files/15254363)
Supplement: Supplementary file 1 [file 15254363]

## Appendices

### Appendix A. Search Strategies using MEDLINE, MEDLINE In Process and EMBASE

Database(s): **Ovid MEDLINE®**

Search Performed between 1946 and November Week 1 2017

Search Strategy:

| #  | Searches                                                         | Results |
|----|------------------------------------------------------------------|---------|
| 1  | Riluzole/ or riluzole.mp.                                        | 1447    |
| 2  | exp Brain Injuries/                                              | 63700   |
| 3  | exp Nervous System Diseases/                                     | 2731558 |
| 4  | exp Nerve Degeneration/                                          | 26048   |
| 5  | exp Spinal Diseases/                                             | 119292  |
| 6  | neurotrauma*.mp.                                                 | 1410    |
| 7  | neurodegenerat*.mp.                                              | 84752   |
| 8  | ((neuro* or brain* or nerve*) adj4 (trauma* or demyelinat*)).mp. | 80431   |
| 9  | ((neuro* or brain* or nerve*) adj4 injur*).mp.                   | 130711  |
| 10 | concussion*.mp.                                                  | 8712    |
| 11 | demyelinate*.mp.                                                 | 32248   |
| 12 | 2 or 3 or 4 or 5 or 6 or 7 or 8 or 9 or 10 or 11                 | 2883102 |
| 13 | 1 and 12                                                         | 976     |

Database(s): **Ovid MEDLINE® Epub Ahead of Print and In-Process & Other Non-Indexed**

## Citations

Search performed on November 13, 2017

Search Strategy:

| #  | Searches                                                         | Results |
|----|------------------------------------------------------------------|---------|
| 1  | Riluzole/ or riluzole.mp.                                        | 154     |
| 2  | exp Brain Injuries/                                              | 7       |
| 3  | exp Nervous System Diseases/                                     | 651     |
| 4  | exp Nerve Degeneration/                                          | 2       |
| 5  | exp Spinal Diseases/                                             | 25      |
| 6  | neurotrauma*.mp.                                                 | 298     |
| 7  | neurodegenerat*.mp.                                              | 13832   |
| 8  | ((neuro* or brain* or nerve*) adj4 (trauma* or lemyelinat*)).mp. | 8648    |
| 9  | ((neuro* or brain* or nerve*) adj4 injur*).mp.                   | 14730   |
| 10 | concussion*.mp.                                                  | 1396    |
| 11 | lemyelinate*.mp.                                                 | 2622    |
| 12 | (chronic adj4 encephalopath*).mp.                                | 214     |
| 13 | (heredodegenerat* adj4 (nerv* or neuro*)).mp.                    | 1       |
| 14 | lewy body.mp.                                                    | 383     |
| 15 | Multiple System Atroph*.mp.                                      | 384     |
| 16 | lemyelina??.tw,hw.                                               | 10939   |
| 17 | (prion adj4 (disease* or infect*)).mp.                           | 557     |

|    |                                 |       |
|----|---------------------------------|-------|
| 18 | neuropath*.mp.                  | 12693 |
| 19 | myoton*.mp.                     | 454   |
| 20 | (spin?? Adj4 atroph*).mp.       | 547   |
| 21 | neurofibromatos*.mp.            | 1284  |
| 22 | motor neuron disease*.mp.       | 514   |
| 23 | Amyotrophic Lateral Sclero*.mp. | 2363  |
| 24 | multiple 2emyel*.mp.            | 7768  |
| 25 | leukoencephal*.mp.              | 741   |
| 26 | encephalomyel*.mp.              | 1485  |
| 27 | neuromyelit*.mp.                | 564   |
| 28 | or/2-27                         | 62326 |
| 29 | 1 and 28                        | 90    |

Database(s): **Embase**

Search performed between 1974 and 2017 November 13

Search Strategy:

| # | Searches                                                         | Results |
|---|------------------------------------------------------------------|---------|
| 1 | riluzole/ or riluzole.mp.                                        | 4085    |
| 2 | neurotrauma*.mp.                                                 | 2957    |
| 3 | neurodegenerat*.mp.                                              | 122803  |
| 4 | ((neuro* or brain* or nerve*) adj4 (trauma* or 2emyelinat*)).mp. | 149490  |

|    |                                                |         |
|----|------------------------------------------------|---------|
| 5  | ((neuro* or brain* or nerve*) adj4 injur*).mp. | 228215  |
| 6  | concussion*.mp.                                | 11568   |
| 7  | 3emyelinate*.mp.                               | 52046   |
| 8  | exp neurologic disease/                        | 3057346 |
| 9  | exp spine disease/                             | 199100  |
| 10 | 2 or 3 or 4 or 5 or 6 or 7 or 8 or 9           | 3257636 |
| 11 | 1 and 10                                       | 3103    |

**Appendix B.** Reasons for Exclusion following Full-Text Investigation

| Author (Year)            | Reason for Exclusion                         |
|--------------------------|----------------------------------------------|
| Albo et al (2004)        | Did not evaluate outcomes of interest        |
| Bergerot et al (2004)    | Ventral root avulsion injury                 |
| Brocard et al (2016)     | Did not evaluate outcomes of interest        |
| Chew et al (2014)        | Spinal root avulsion injury                  |
| Coderre et al (2007)     | Chronic constriction injury of sciatic nerve |
| Ghayour et al (2017)     | Sciatic nerve crush injury                   |
| Hassanzadeh et al (2010) | Did not evaluate outcomes of interest        |
| Hobo et al (2011)        | Peripheral nerve injury                      |
| Kai et al (2006)         | Chronic constriction injury of sciatic nerve |
| Lin et al (2017)         | Spinal seizure-like activity                 |
| Mazzone et al (2011)     | Did not evaluate outcomes of interest        |
| McAdoo et al (2005)      | Did not evaluate outcomes of interest        |
| Medico et al (2004)      | Post-traumatic peripheral neuropathy         |
| Mu et al (2000)          | Did not evaluate outcomes of interest        |
| Nicholson et al (2014)   | Painful nerve root compression               |
| Nogradi et al (2007)     | Spinal root avulsion injury                  |
| Pinter et al (2010)      | Ventral root avulsion injury                 |
| Samano et al (2012)      | Did not evaluate outcomes of interest        |
| Schmidt et al (2008)     | Not on spinal cord pathology                 |
| Shortland et al (2006)   | Spinal root avulsion injury                  |
| Springer et al (1997)    | Did not evaluate outcomes of interest        |

|                         |                                           |
|-------------------------|-------------------------------------------|
| Stutzmann et al (1996)  | No evaluation of statistical significance |
| Xie et al (2011)        | Dorsal root ganglion injury               |
| Xie et al (2012)        | Dorsal root ganglion injury               |
| Zmyslowski et al (2017) | Sciatic nerve crush injury                |

**Appendix C.** Evaluation of Risk of Bias using the SYRCLE’s tool: Ates et al (2007) to Lips et al (2000)

| Type of Bias and Associated Questions                                                         | Ates (2007) | Hama (2011) | Hosier (2015) | Karadima s (2015) | Kitzma n (2009) | Lang-Lazdunski (2000) | Lang-Lazdunski (1999) | Lang-Lazdunski (2000) | Lips (2000) |
|-----------------------------------------------------------------------------------------------|-------------|-------------|---------------|-------------------|-----------------|-----------------------|-----------------------|-----------------------|-------------|
| Was the allocation sequence adequately generated and applied?                                 | Yes         | Yes         | Yes           | Yes               | Yes             | Yes                   | Yes                   | Yes                   | Yes         |
| Were the groups similar at baseline or was there adjustment for confounders in the analysis?  | Yes         | Yes         | NA            | NA                | NA              | NA                    | NA                    | NA                    | Yes         |
| Was the allocation adequately concealed?                                                      | Yes         | Yes         | No            | Yes               | Yes             | Yes                   | Yes                   | Yes                   | Yes         |
| Were the animals randomly housed during the experiment?                                       | NA          | NA          | Yes           | NA                | Yes             | Yes                   | NA                    | NA                    | NA          |
| Were the caregivers and/or investigators blinded from which intervention each animal received | NA          | NA          | Yes           | NA                | Yes             | NA                    | NA                    | NA                    | NA          |

|                                                                                          |                                                            |                                  |     |     |     |                                                        |     |     |                                                                           |
|------------------------------------------------------------------------------------------|------------------------------------------------------------|----------------------------------|-----|-----|-----|--------------------------------------------------------|-----|-----|---------------------------------------------------------------------------|
| during the experiment?                                                                   |                                                            |                                  |     |     |     |                                                        |     |     |                                                                           |
| Were animals selected at random for outcome assessment?                                  | Yes                                                        | Yes                              | Yes | Yes | NA  | Yes                                                    | Yes | Yes | Yes                                                                       |
| Was the outcome assessor blinded?                                                        | NA                                                         | NA                               | Yes | Yes | NA  | Yes                                                    | Yes | Yes | Yes                                                                       |
| Were incomplete outcome data adequately addressed?                                       | Yes                                                        | NA                               | NA  | NA  | NA  | Yes                                                    | NA  | NA  | Yes                                                                       |
| Are reports of the study free of selective outcome reporting?                            | NA                                                         | NA                               | NA  | Yes | NA  | NA                                                     | NA  | NA  | NA                                                                        |
| Was the study apparently free of other problems that could results in high risk of bias? | No – replace<br>d rats<br>that<br>died<br>with<br>new rats | No – smaller<br>control<br>group | Yes | Yes | Yes | No –<br>replaced<br>rats that<br>died with<br>new rats | Yes | Yes | No –<br>replace<br>d<br>rabbits<br>that<br>died<br>with<br>new<br>rabbits |



Appendix C. Evaluation of Risk of Bias using the SYRCLE's tool: Moon et al (2014) to Wu et al (2014)

| Type of Bias and Associated Questions                                                                                | Moon (2014) | Mu (2000) | Satkunendrarajah (2016) | Schwartz and Fehlings (2001) | Vasconcelos (2016) | Wu (2013) | Wu (2014) |
|----------------------------------------------------------------------------------------------------------------------|-------------|-----------|-------------------------|------------------------------|--------------------|-----------|-----------|
| Was the allocation sequence adequately generated and applied?                                                        | Yes         | Yes       | Yes                     | Yes                          | Yes                | Yes       | Yes       |
| Were the groups similar at baseline or was there adjustment for confounders in the analysis?                         | Yes         | NA        | NA                      | NA                           | NA                 | Yes       | NA        |
| Was the allocation adequately concealed?                                                                             | Yes         | Yes       | Yes                     | Yes                          | Yes                | Yes       | Yes       |
| Were the animals randomly housed during the experiment?                                                              | NA          | NA        | NA                      | NA                           | Yes                | Yes       | Yes       |
| Were the caregivers and/or investigators blinded from which intervention each animal received during the experiment? | NA          | NA        | Yes                     | Yes                          | Yes                | NA        | Yes       |

|                                                                                          |     |     |     |     |     |     |     |
|------------------------------------------------------------------------------------------|-----|-----|-----|-----|-----|-----|-----|
| Were animals selected at random for outcome assessment?                                  | Yes |
| Was the outcome assessor blinded?                                                        | Yes | Yes | Yes | NA  | Yes | Yes | NA  |
| Were incomplete outcome data adequately addressed?                                       | NA  |
| Are reports of the study free of selective outcome reporting?                            | NA  |
| Was the study apparently free of other problems that could results in high risk of bias? | Yes |
